# Supplementary material
Source: ML conference proceedings conference paper supplement (https://aclanthology.org/2020.emnlp-main.252)
Supplement: OptionalSupplementaryMaterial [file Readme.pdf › Readme.pdf]

#### Hardware Environment

- Windows 10
- 1 GPU, Nvidia Geforce RTX 2080 Ti

#### Dependency Requirement

- Python 3.6
- Tensorflow 1.14.0
- sklearn, numpy, scipy

#### Dataset Construction Steps

- Download “clause\_keywords.csv” and “w2c\_200.txt” from the original ECPE dataset <https://github.com/NUSTM/ECPE>
- Put the above two files in the folder named “nega\_data”
- Run the “preprocess.py” to get the manually labeled dataset, which will be stored in a file called “data.txt”
- Run the “gen\_nega\_samples.py” to generate the constructed dataset, which is stored in a file called “data\_wneg.txt”
- If you prefer our training/testing split, please run “divide\_fold.py” to get 20 files, which will be named as “foldx\_train.txt” and “foldx\_test.txt”, where “x” should be from 1 to 10.

#### Average Runtime Reminder:

- 2 hours per program for models containing LSTM and Self-Attention Module.
- 1.5 hours per program for models with Concatenation Module.

#### Run a program:

- Make sure you complete the dataset construction first
- Directly run “python programname.py”, where the “programname” is the python file you want to run.
